# Supplementary material
Source: Springer Nature journal article supplement (https://www.springermedizin.de/resource/supplementary/12881_2006_204_MOESM3_ESM.pdf/9452628)
Supplement: MOESM3 [file 9452628]

| Supplementary Table 3: Genotyping and statistical results for SNPs - grouped genotypes |              |               |                      |             |         |        |  |                    |               |         |        |
|----------------------------------------------------------------------------------------|--------------|---------------|----------------------|-------------|---------|--------|--|--------------------|---------------|---------|--------|
|                                                                                        | Polymorphism | variable      | Homozygote Reference | Any Variant | p-value | Test   |  | Homozygote Variant | Any Reference | p-value | Test   |
| <b>Stage at Diagnosis</b>                                                              | MMP9_1562    | 0             | 38 (66%)             | 20 (35%)    |         |        |  | 3 (5%)             | 55 (95%)      |         |        |
|                                                                                        | MMP9_1562    | I             | 352 (71%)            | 147 (30%)   |         |        |  | 9 (2%)             | 490 (98%)     |         |        |
|                                                                                        | MMP9_1562    | II            | 170 (73%)            | 63 (27%)    |         |        |  | 1 (0%)             | 232 (100%)    |         |        |
|                                                                                        | MMP9_1562    | III           | 128 (77%)            | 39 (23%)    |         |        |  | 3 (2%)             | 164 (98%)     |         |        |
|                                                                                        | MMP9_1562    | IV            | 8 (89%)              | 1 (11%)     | 0.04    | Trend  |  | 0 (0%)             | 9 (100%)      | 0.16    | Trend  |
| <b>Current Stage</b>                                                                   | MMP9_1562    | 0             | 36 (64%)             | 20 (36%)    |         |        |  | 3 (5%)             | 53 (95%)      |         |        |
|                                                                                        | MMP9_1562    | I             | 300 (70%)            | 131 (30%)   |         |        |  | 8 (2%)             | 423 (98%)     |         |        |
|                                                                                        | MMP9_1562    | II            | 118 (75%)            | 40 (25%)    |         |        |  | 0 (0%)             | 158 (100%)    |         |        |
|                                                                                        | MMP9_1562    | III           | 159 (74%)            | 55 (26%)    |         |        |  | 4 (2%)             | 210 (98%)     |         |        |
|                                                                                        | MMP9_1562    | IV            | 100 (78%)            | 28 (22%)    | <0.01   | Trend  |  | 2 (2%)             | 126 (98%)     | 0.32    | Trend  |
| <b>Thickness</b>                                                                       | MMP9_1562    | in situ       | 38 (66%)             | 20 (35%)    |         |        |  | 3 (5%)             | 55 (95%)      |         |        |
|                                                                                        | MMP9_1562    | <1.01         | 218 (69%)            | 99 (31%)    |         |        |  | 6 (2%)             | 311 (98%)     |         |        |
|                                                                                        | MMP9_1562    | 1.01 - 2.00   | 203 (75%)            | 68 (25%)    |         |        |  | 3 (1%)             | 268 (99%)     |         |        |
|                                                                                        | MMP9_1562    | 2.01 - 4.00   | 118 (74%)            | 41 (26%)    |         |        |  | 3 (2%)             | 156 (98%)     |         |        |
|                                                                                        | MMP9_1562    | >4.00         | 85 (71%)             | 34 (29%)    | 0.2     | Trend  |  | 1 (1%)             | 118 (99%)     | 0.16    | Trend  |
| <b>Clark Level</b>                                                                     | MMP9_1562    | I = in situ   | 38 (66%)             | 20 (35%)    |         |        |  | 3 (5%)             | 55 (95%)      |         |        |
|                                                                                        | MMP9_1562    | II            | 74 (69%)             | 33 (31%)    |         |        |  | 2 (2%)             | 105 (98%)     |         |        |
|                                                                                        | MMP9_1562    | III           | 99 (67%)             | 49 (33%)    |         |        |  | 4 (3%)             | 144 (97%)     |         |        |
|                                                                                        | MMP9_1562    | IV            | 355 (74%)            | 128 (27%)   |         |        |  | 5 (1%)             | 478 (99%)     |         |        |
|                                                                                        | MMP9_1562    | V             | 46 (67%)             | 23 (33%)    | 0.28    | Trend  |  | 1 (1%)             | 68 (99%)      | 0.04    | Trend  |
| <b>Tumor Infiltrating Lymphocytes</b>                                                  | MMP9_1562    | absent        | 148 (73%)            | 56 (28%)    |         |        |  | 4 (2%)             | 200 (98%)     |         |        |
|                                                                                        | MMP9_1562    | non-brisk     | 281 (72%)            | 110 (28%)   |         |        |  | 3 (1%)             | 388 (99%)     |         |        |
|                                                                                        | MMP9_1562    | brisk         | 23 (74%)             | 8 (26%)     | 1       | Trend  |  | 0 (0%)             | 31 (100%)     | 0.16    | Trend  |
| <b>Number of Moles</b>                                                                 | MMP9_1562    | none          | 187 (72%)            | 72 (28%)    |         |        |  | 6 (2%)             | 253 (98%)     |         |        |
|                                                                                        | MMP9_1562    | few           | 358 (73%)            | 135 (27%)   |         |        |  | 8 (2%)             | 485 (98%)     |         |        |
|                                                                                        | MMP9_1562    | moderate      | 116 (70%)            | 50 (30%)    |         |        |  | 2 (1%)             | 164 (99%)     |         |        |
|                                                                                        | MMP9_1562    | many          | 29 (73%)             | 11 (28%)    | 0.72    | Trend  |  | 1 (3%)             | 39 (98%)      | 0.56    | Trend  |
|                                                                                        | MMP9_1562    | 6 = many      | 4 (67%)              | 2 (33%)     | 0.6     | Trend  |  | 0 (0%)             | 6 (100%)      | 0.12    | Trend  |
| <b>Phenotypic Index</b>                                                                | MMP9_1562    | 1 = low risk  | 24 (63%)             | 14 (37%)    |         |        |  | 0 (0%)             | 38 (100%)     |         |        |
|                                                                                        | MMP9_1562    | 2             | 159 (76%)            | 49 (24%)    |         |        |  | 1 (1%)             | 207 (100%)    |         |        |
|                                                                                        | MMP9_1562    | 3             | 220 (70%)            | 93 (30%)    |         |        |  | 8 (3%)             | 305 (97%)     |         |        |
|                                                                                        | MMP9_1562    | 4             | 241 (74%)            | 85 (26%)    |         |        |  | 5 (2%)             | 321 (99%)     |         |        |
|                                                                                        | MMP9_1562    | 5 = high risk | 71 (68%)             | 33 (32%)    | 0.76    | Trend  |  | 3 (3%)             | 101 (97%)     | 0.16    | Trend  |
| <b>Sex</b>                                                                             | MMP9_1562    | F             | 310 (73%)            | 115 (27%)   |         |        |  | 8 (2%)             | 417 (98%)     |         |        |
|                                                                                        | MMP9_1562    | M             | 406 (72%)            | 162 (29%)   | 0.6     | Fisher |  | 9 (2%)             | 559 (98%)     | 0.8     | Fisher |
| <b>Family History</b>                                                                  | MMP9_1562    | N             | 599 (73%)            | 220 (27%)   |         |        |  | 13 (2%)            | 806 (98%)     |         |        |
|                                                                                        | MMP9_1562    | Y             | 112 (68%)            | 53 (32%)    | 0.2     | Fisher |  | 4 (2%)             | 161 (98%)     | 0.52    | Fisher |
| <b>Multiple Primary</b>                                                                | MMP9_1562    | N             | 614 (73%)            | 229 (27%)   |         |        |  | 15 (2%)            | 828 (98%)     |         |        |

|                                | Polymorphism | variable           | Homozygote Reference | Any Variant | p-value | Test       |  | Homozygote Variant | Any Reference | p-value | Test       |
|--------------------------------|--------------|--------------------|----------------------|-------------|---------|------------|--|--------------------|---------------|---------|------------|
| <b>Dysplastic Nevus</b>        | MMP9_1562    | Y                  | 102 (69%)            | 47 (32%)    | 0.28    | Fisher     |  | 2 (1%)             | 147 (99%)     | 1       | Fisher     |
|                                | MMP9_1562    | N                  | 396 (73%)            | 145 (27%)   |         |            |  | 9 (2%)             | 532 (98%)     |         |            |
| <b>Ulceration</b>              | MMP9_1562    | Y                  | 143 (66%)            | 73 (34%)    | 0.08    | Fisher     |  | 4 (2%)             | 212 (98%)     | 1       | Fisher     |
|                                | MMP9_1562    | absent             | 379 (71%)            | 154 (29%)   |         |            |  | 9 (2%)             | 524 (98%)     |         |            |
| <b>Regression</b>              | MMP9_1562    | present            | 138 (74%)            | 49 (26%)    | 0.52    | Fisher     |  | 2 (1%)             | 185 (99%)     | 0.72    | Fisher     |
|                                | MMP9_1562    | absent             | 270 (72%)            | 103 (28%)   |         |            |  | 3 (1%)             | 370 (99%)     |         |            |
| <b>Lymphovascular Invasion</b> | MMP9_1562    | present            | 184 (71%)            | 75 (29%)    | 0.72    | Fisher     |  | 4 (2%)             | 255 (99%)     | 0.44    | Fisher     |
|                                | MMP9_1562    | absent             | 404 (72%)            | 159 (28%)   |         |            |  | 7 (1%)             | 556 (99%)     |         |            |
| <b>Perineural Invasion</b>     | MMP9_1562    | present            | 50 (74%)             | 18 (27%)    | 0.88    | Fisher     |  | 1 (2%)             | 67 (99%)      | 0.6     | Fisher     |
|                                | MMP9_1562    | absent             | 306 (72%)            | 117 (28%)   |         |            |  | 5 (1%)             | 418 (99%)     |         |            |
| <b>Mitotic Index</b>           | MMP9_1562    | present            | 42 (68%)             | 20 (32%)    | 0.44    | Fisher     |  | 0 (0%)             | 62 (100%)     | 1       | Fisher     |
|                                | MMP9_1562    | absent             | 73 (72%)             | 29 (28%)    |         |            |  | 2 (2%)             | 100 (98%)     |         |            |
| <b>Satellites</b>              | MMP9_1562    | present            | 327 (72%)            | 129 (28%)   | 1       | Fisher     |  | 4 (1%)             | 452 (99%)     | 0.32    | Fisher     |
|                                | MMP9_1562    | absent             | 191 (76%)            | 60 (24%)    |         |            |  | 1 (0%)             | 250 (100%)    |         |            |
| <b>Solar Elastosis</b>         | MMP9_1562    | present            | 25 (83%)             | 5 (17%)     | 0.48    | Fisher     |  | 0 (0%)             | 30 (100%)     | 1       | Fisher     |
|                                | MMP9_1562    | absent             | 18 (82%)             | 4 (18%)     |         |            |  | 0 (0%)             | 22 (100%)     |         |            |
| <b>Distant Metastasis</b>      | MMP9_1562    | present            | 31 (78%)             | 9 (23%)     | 0.76    | Fisher     |  | 0 (0%)             | 40 (100%)     | 0.76    | Fisher     |
|                                | MMP9_1562    | N                  | 615 (71%)            | 247 (29%)   |         |            |  | 15 (2%)            | 847 (98%)     |         |            |
| <b>Intransit Metastasis</b>    | MMP9_1562    | Y                  | 101 (78%)            | 28 (22%)    | 0.12    | Fisher     |  | 2 (2%)             | 127 (98%)     | 1       | Fisher     |
|                                | MMP9_1562    | N                  | 668 (72%)            | 265 (28%)   |         |            |  | 16 (2%)            | 917 (98%)     |         |            |
| <b>Tan/Burn Index</b>          | MMP9_1562    | Y                  | 21 (78%)             | 6 (22%)     | 0.68    | Fisher     |  | 1 (4%)             | 26 (96%)      | 0.4     | Fisher     |
|                                | MMP9_1562    | tend to tan        | 59 (65%)             | 32 (35%)    |         |            |  | 2 (2%)             | 89 (98%)      |         |            |
| <b>Race</b>                    | MMP9_1562    | tend to sunburn    | 657 (73%)            | 245 (27%)   | 0.12    | Fisher     |  | 15 (2%)            | 887 (98%)     | 0.68    | Fisher     |
|                                | MMP9_1562    | White non-Hispanic | 682 (72%)            | 270 (28%)   |         |            |  | 16 (2%)            | 936 (98%)     |         |            |
| <b>Site</b>                    | MMP9_1562    | Hispanic           | 9 (82%)              | 2 (18%)     |         |            |  | 0 (0%)             | 11 (100%)     |         |            |
|                                | MMP9_1562    | Black non-Hispanic | 10 (91%)             | 1 (9%)      |         |            |  | 1 (9%)             | 10 (91%)      |         |            |
|                                | MMP9_1562    | Asian/Indian       | 2 (67%)              | 1 (33%)     | 0.48    | Chi-Square |  | 0 (0%)             | 3 (100%)      | 0.28    | Chi-Square |
|                                | MMP9_1562    | extremities        | 378 (71%)            | 155 (29%)   |         |            |  | 10 (2%)            | 523 (98%)     |         |            |
| <b>Histology</b>               | MMP9_1562    | head & neck        | 49 (69%)             | 22 (31%)    |         |            |  | 1 (1%)             | 70 (99%)      |         |            |
|                                | MMP9_1562    | non-cutaneous      | 6 (55%)              | 5 (46%)     |         |            |  | 2 (18%)            | 9 (82%)       |         |            |
|                                | MMP9_1562    | trunk              | 249 (74%)            | 87 (26%)    | 0.4     | Chi-Square |  | 4 (1%)             | 332 (99%)     | <0.01   | Chi-Square |
|                                | MMP9_1562    | desmoplastic       | 17 (74%)             | 6 (26%)     |         |            |  | 0 (0%)             | 23 (100%)     |         |            |
| <b>Stage at Diagnosis</b>      | MMP9_1562    | other              | 171 (71%)            | 69 (29%)    |         |            |  | 4 (2%)             | 236 (98%)     |         |            |
|                                | MMP9_1562    | spitzoid           | 8 (80%)              | 2 (20%)     |         |            |  | 0 (0%)             | 10 (100%)     |         |            |
|                                | MMP9_1562    | unknown            | 520 (72%)            | 200 (28%)   | 0.92    | Chi-Square |  | 13 (2%)            | 707 (98%)     | 0.88    | Chi-Square |
| <b>Current Stage</b>           | MMP9_279     | 0                  | 27 (47%)             | 31 (53%)    |         |            |  | 9 (16%)            | 49 (85%)      |         |            |
|                                | MMP9_279     | I                  | 200 (40%)            | 304 (60%)   |         |            |  | 72 (14%)           | 432 (86%)     |         |            |
|                                | MMP9_279     | II                 | 91 (39%)             | 143 (61%)   |         |            |  | 26 (11%)           | 208 (89%)     |         |            |
|                                | MMP9_279     | III                | 82 (49%)             | 87 (52%)    |         |            |  | 20 (12%)           | 149 (88%)     |         |            |
|                                | MMP9_279     | IV                 | 4 (44%)              | 5 (56%)     | 0.24    | Trend      |  | 0 (0%)             | 9 (100%)      | 0.16    | Trend      |
| <b>Thickness</b>               | MMP9_279     | 0                  | 25 (45%)             | 31 (55%)    |         |            |  | 9 (16%)            | 47 (84%)      |         |            |
|                                | MMP9_279     | I                  | 174 (40%)            | 261 (60%)   |         |            |  | 62 (14%)           | 373 (86%)     |         |            |
|                                | MMP9_279     | II                 | 60 (38%)             | 99 (62%)    |         |            |  | 15 (9%)            | 144 (91%)     |         |            |
|                                | MMP9_279     | III                | 99 (46%)             | 117 (54%)   |         |            |  | 25 (12%)           | 191 (88%)     |         |            |
| <b>Thickness</b>               | MMP9_279     | IV                 | 59 (46%)             | 70 (54%)    | 0.2     | Trend      |  | 18 (14%)           | 111 (86%)     | 0.44    | Trend      |
|                                | MMP9_279     | in situ            | 27 (47%)             | 31 (53%)    |         |            |  | 9 (16%)            | 49 (85%)      |         |            |

|                                       | Polymorphism | variable      | Homozygote Reference | Any Variant | p-value | Test   |  | Homozygote Variant | Any Reference | p-value | Test   |
|---------------------------------------|--------------|---------------|----------------------|-------------|---------|--------|--|--------------------|---------------|---------|--------|
|                                       | MMP9_279     | <1.01         | 127 (40%)            | 194 (60%)   |         |        |  | 45 (14%)           | 276 (86%)     |         |        |
|                                       | MMP9_279     | 1.01 - 2.00   | 117 (43%)            | 155 (57%)   |         |        |  | 38 (14%)           | 234 (86%)     |         |        |
|                                       | MMP9_279     | 2.01 - 4.00   | 65 (41%)             | 95 (59%)    |         |        |  | 21 (13%)           | 139 (87%)     |         |        |
|                                       | MMP9_279     | >4.00         | 43 (36%)             | 78 (65%)    | 0.36    | Trend  |  | 11 (9%)            | 110 (91%)     | 0.2     | Trend  |
| <b>Clark Level</b>                    | MMP9_279     | I = in situ   | 27 (47%)             | 31 (53%)    |         |        |  | 9 (16%)            | 49 (85%)      |         |        |
|                                       | MMP9_279     | II            | 38 (35%)             | 70 (65%)    |         |        |  | 13 (12%)           | 95 (88%)      |         |        |
|                                       | MMP9_279     | III           | 64 (43%)             | 86 (57%)    |         |        |  | 21 (14%)           | 129 (86%)     |         |        |
|                                       | MMP9_279     | IV            | 194 (40%)            | 294 (60%)   |         |        |  | 67 (14%)           | 421 (86%)     |         |        |
|                                       | MMP9_279     | V             | 26 (38%)             | 43 (62%)    | 0.64    | Trend  |  | 7 (10%)            | 62 (90%)      | 0.72    | Trend  |
| <b>Tumor Infiltrating Lymphocytes</b> | MMP9_279     | absent        | 89 (43%)             | 117 (57%)   |         |        |  | 19 (9%)            | 187 (91%)     |         |        |
|                                       | MMP9_279     | non-brisk     | 155 (39%)            | 241 (61%)   |         |        |  | 46 (12%)           | 350 (88%)     |         |        |
|                                       | MMP9_279     | brisk         | 14 (45%)             | 17 (55%)    | 0.6     | Trend  |  | 4 (13%)            | 27 (87%)      | 0.36    | Trend  |
| <b>Number of Moles</b>                | MMP9_279     | none          | 117 (45%)            | 143 (55%)   |         |        |  | 36 (14%)           | 224 (86%)     |         |        |
|                                       | MMP9_279     | few           | 201 (40%)            | 296 (60%)   |         |        |  | 64 (13%)           | 433 (87%)     |         |        |
|                                       | MMP9_279     | moderate      | 69 (41%)             | 100 (59%)   |         |        |  | 22 (13%)           | 147 (87%)     |         |        |
|                                       | MMP9_279     | many          | 17 (43%)             | 23 (58%)    | 0.44    | Trend  |  | 5 (13%)            | 35 (88%)      | 0.76    | Trend  |
| <b>Number of Freckles</b>             | MMP9_279     | 1 = none      | 198 (41%)            | 283 (59%)   |         |        |  | 61 (13%)           | 420 (87%)     |         |        |
|                                       | MMP9_279     | 2             | 114 (48%)            | 126 (53%)   |         |        |  | 26 (11%)           | 214 (89%)     |         |        |
|                                       | MMP9_279     | 3             | 70 (41%)             | 102 (59%)   |         |        |  | 25 (15%)           | 147 (86%)     |         |        |
|                                       | MMP9_279     | 4             | 23 (35%)             | 42 (65%)    |         |        |  | 13 (20%)           | 52 (80%)      |         |        |
|                                       | MMP9_279     | 5             | 6 (35%)              | 11 (65%)    |         |        |  | 1 (6%)             | 16 (94%)      |         |        |
|                                       | MMP9_279     | 6 = many      | 3 (50%)              | 3 (50%)     | 0.64    | Trend  |  | 0 (0%)             | 6 (100%)      | 0.56    | Trend  |
| <b>Phenotypic Index</b>               | MMP9_279     | 1 = low risk  | 8 (21%)              | 30 (79%)    |         |        |  | 7 (18%)            | 31 (82%)      |         |        |
|                                       | MMP9_279     | 2             | 99 (47%)             | 111 (53%)   |         |        |  | 27 (13%)           | 183 (87%)     |         |        |
|                                       | MMP9_279     | 3             | 129 (41%)            | 187 (59%)   |         |        |  | 44 (14%)           | 272 (86%)     |         |        |
|                                       | MMP9_279     | 4             | 145 (44%)            | 183 (56%)   |         |        |  | 34 (10%)           | 294 (90%)     |         |        |
|                                       | MMP9_279     | 5 = high risk | 39 (37%)             | 66 (63%)    | 0.92    | Trend  |  | 17 (16%)           | 88 (84%)      | 0.6     | Trend  |
| <b>Sex</b>                            | MMP9_279     | F             | 185 (43%)            | 244 (57%)   |         |        |  | 52 (12%)           | 377 (88%)     |         |        |
|                                       | MMP9_279     | M             | 235 (41%)            | 337 (59%)   | 0.52    | Fisher |  | 78 (14%)           | 494 (86%)     | 0.52    | Fisher |
| <b>Family History</b>                 | MMP9_279     | N             | 352 (43%)            | 473 (57%)   |         |        |  | 105 (13%)          | 720 (87%)     |         |        |
|                                       | MMP9_279     | Y             | 65 (39%)             | 102 (61%)   | 0.4     | Fisher |  | 24 (14%)           | 143 (86%)     | 0.6     | Fisher |
| <b>Multiple Primary</b>               | MMP9_279     | N             | 361 (43%)            | 488 (58%)   |         |        |  | 109 (13%)          | 740 (87%)     |         |        |
|                                       | MMP9_279     | Y             | 59 (39%)             | 92 (61%)    | 0.48    | Fisher |  | 21 (14%)           | 130 (86%)     | 0.68    | Fisher |
| <b>Dysplastic Nevus</b>               | MMP9_279     | N             | 239 (44%)            | 304 (56%)   |         |        |  | 69 (13%)           | 474 (87%)     |         |        |
|                                       | MMP9_279     | Y             | 80 (37%)             | 138 (63%)   | 0.08    | Fisher |  | 35 (16%)           | 183 (84%)     | 0.24    | Fisher |
| <b>Ulceration</b>                     | MMP9_279     | absent        | 213 (40%)            | 324 (60%)   |         |        |  | 70 (13%)           | 467 (87%)     |         |        |
|                                       | MMP9_279     | present       | 77 (41%)             | 113 (60%)   | 0.88    | Fisher |  | 24 (13%)           | 166 (87%)     | 1       | Fisher |
| <b>Regression</b>                     | MMP9_279     | absent        | 165 (44%)            | 212 (56%)   |         |        |  | 38 (10%)           | 339 (90%)     |         |        |
|                                       | MMP9_279     | present       | 100 (38%)            | 162 (62%)   | 0.16    | Fisher |  | 32 (12%)           | 230 (88%)     | 0.44    | Fisher |
| <b>Lymphovascular Invasion</b>        | MMP9_279     | absent        | 230 (40%)            | 339 (60%)   |         |        |  | 68 (12%)           | 501 (88%)     |         |        |
|                                       | MMP9_279     | present       | 28 (41%)             | 40 (59%)    | 0.88    | Fisher |  | 7 (10%)            | 61 (90%)      | 0.84    | Fisher |
| <b>Perineural Invasion</b>            | MMP9_279     | absent        | 174 (41%)            | 254 (59%)   |         |        |  | 52 (12%)           | 376 (88%)     |         |        |
|                                       | MMP9_279     | present       | 25 (40%)             | 37 (60%)    | 1       | Fisher |  | 5 (8%)             | 57 (92%)      | 0.52    | Fisher |
| <b>Mitotic Index</b>                  | MMP9_279     | absent        | 42 (41%)             | 61 (59%)    |         |        |  | 13 (13%)           | 90 (87%)      |         |        |
|                                       | MMP9_279     | present       | 188 (41%)            | 273 (59%)   | 1       | Fisher |  | 53 (12%)           | 408 (89%)     | 0.72    | Fisher |
| <b>Satellites</b>                     | MMP9_279     | absent        | 110 (43%)            | 144 (57%)   |         |        |  | 18 (7%)            | 236 (93%)     |         |        |

|                                       | Polymorphism | variable           | Homozygote Reference | Any Variant | p-value | Test       |  | Homozygote Variant | Any Reference | p-value | Test       |
|---------------------------------------|--------------|--------------------|----------------------|-------------|---------|------------|--|--------------------|---------------|---------|------------|
| <b>Solar Elastosis</b>                | MMP9_279     | present            | 13 (43%)             | 17 (57%)    | 1       | Fisher     |  | 4 (13%)            | 26 (87%)      | 0.28    | Fisher     |
|                                       | MMP9_279     | absent             | 15 (68%)             | 7 (32%)     |         |            |  | 0 (0%)             | 22 (100%)     |         |            |
| <b>Distant Metastasis</b>             | MMP9_279     | present            | 15 (38%)             | 25 (63%)    | 0.04    | Fisher     |  | 4 (10%)            | 36 (90%)      | 0.28    | Fisher     |
|                                       | MMP9_279     | N                  | 360 (41%)            | 509 (59%)   |         |            |  | 112 (13%)          | 757 (87%)     |         |            |
| <b>Intransit Metastasis</b>           | MMP9_279     | Y                  | 60 (46%)             | 70 (54%)    | 0.36    | Fisher     |  | 18 (14%)           | 112 (86%)     | 0.76    | Fisher     |
|                                       | MMP9_279     | N                  | 384 (41%)            | 557 (59%)   |         |            |  | 122 (13%)          | 819 (87%)     |         |            |
| <b>Tan/Burn Index</b>                 | MMP9_279     | Y                  | 17 (63%)             | 10 (37%)    | 0.04    | Fisher     |  | 3 (11%)            | 24 (89%)      | 1       | Fisher     |
|                                       | MMP9_279     | tend to tan        | 26 (29%)             | 65 (71%)    |         |            |  | 17 (19%)           | 74 (81%)      |         |            |
| <b>Race</b>                           | MMP9_279     | tend to sunburn    | 394 (43%)            | 516 (57%)   | <0.01   | Fisher     |  | 113 (12%)          | 797 (88%)     | 0.12    | Fisher     |
|                                       | MMP9_279     | White non-Hispanic | 401 (42%)            | 559 (58%)   |         |            |  | 127 (13%)          | 833 (87%)     |         |            |
| <b>Site</b>                           | MMP9_279     | Hispanic           | 6 (55%)              | 5 (46%)     |         |            |  | 0 (0%)             | 11 (100%)     |         |            |
|                                       | MMP9_279     | Black non-Hispanic | 5 (46%)              | 6 (55%)     |         |            |  | 1 (9%)             | 10 (91%)      |         |            |
|                                       | MMP9_279     | Asian/Indian       | 1 (33%)              | 2 (67%)     | 0.84    | Chi-Square |  | 0 (0%)             | 3 (100%)      | 0.52    | Chi-Square |
|                                       | MMP9_279     | extremities        | 212 (40%)            | 323 (60%)   |         |            |  | 75 (14%)           | 460 (86%)     |         |            |
|                                       | MMP9_279     | head & neck        | 25 (35%)             | 46 (65%)    |         |            |  | 16 (23%)           | 55 (78%)      |         |            |
| <b>Histology</b>                      | MMP9_279     | non-cutaneous      | 6 (50%)              | 6 (50%)     |         |            |  | 2 (17%)            | 10 (83%)      |         |            |
|                                       | MMP9_279     | trunk              | 152 (45%)            | 189 (55%)   | 0.32    | Chi-Square |  | 34 (10%)           | 307 (90%)     | 0.04    | Chi-Square |
|                                       | MMP9_279     | desmoplastic       | 7 (30%)              | 16 (70%)    |         |            |  | 4 (17%)            | 19 (83%)      |         |            |
|                                       | MMP9_279     | other              | 91 (37%)             | 153 (63%)   |         |            |  | 31 (13%)           | 213 (87%)     |         |            |
|                                       | MMP9_279     | spitzoid           | 3 (30%)              | 7 (70%)     |         |            |  | 1 (10%)            | 9 (90%)       |         |            |
| <b>Stage at Diagnosis</b>             | MMP9_279     | unknown            | 319 (44%)            | 405 (56%)   | 0.16    | Chi-Square |  | 94 (13%)           | 630 (87%)     | 0.92    | Chi-Square |
|                                       | MMP9_574     | 0                  | 28 (90%)             | 3 (10%)     |         |            |  | 1 (3%)             | 30 (97%)      |         |            |
|                                       | MMP9_574     | I                  | 257 (92%)            | 21 (8%)     |         |            |  | 0 (0%)             | 278 (100%)    |         |            |
|                                       | MMP9_574     | II                 | 100 (89%)            | 13 (12%)    |         |            |  | 0 (0%)             | 113 (100%)    |         |            |
|                                       | MMP9_574     | III                | 84 (89%)             | 10 (11%)    |         |            |  | 0 (0%)             | 94 (100%)     |         |            |
| <b>Current Stage</b>                  | MMP9_574     | IV                 | 3 (75%)              | 1 (25%)     | 0.24    | Trend      |  | 0 (0%)             | 4 (100%)      | 0.08    | Trend      |
|                                       | MMP9_574     | 0                  | 27 (90%)             | 3 (10%)     |         |            |  | 1 (3%)             | 29 (97%)      |         |            |
|                                       | MMP9_574     | I                  | 221 (92%)            | 19 (8%)     |         |            |  | 0 (0%)             | 240 (100%)    |         |            |
|                                       | MMP9_574     | II                 | 68 (88%)             | 9 (12%)     |         |            |  | 0 (0%)             | 77 (100%)     |         |            |
|                                       | MMP9_574     | III                | 87 (90%)             | 10 (10%)    |         |            |  | 0 (0%)             | 97 (100%)     |         |            |
| <b>Thickness</b>                      | MMP9_574     | IV                 | 79 (92%)             | 7 (8%)      | 0.84    | Trend      |  | 0 (0%)             | 86 (100%)     | 0.12    | Trend      |
|                                       | MMP9_574     | in situ            | 28 (90%)             | 3 (10%)     |         |            |  | 1 (3%)             | 30 (97%)      |         |            |
|                                       | MMP9_574     | <1.01              | 172 (93%)            | 14 (8%)     |         |            |  | 0 (0%)             | 186 (100%)    |         |            |
|                                       | MMP9_574     | 1.01 - 2.00        | 126 (93%)            | 10 (7%)     |         |            |  | 0 (0%)             | 136 (100%)    |         |            |
|                                       | MMP9_574     | 2.01 - 4.00        | 68 (85%)             | 12 (15%)    |         |            |  | 0 (0%)             | 80 (100%)     |         |            |
| <b>Clark Level</b>                    | MMP9_574     | >4.00              | 59 (92%)             | 5 (8%)      | 0.44    | Trend      |  | 0 (0%)             | 64 (100%)     | 0.08    | Trend      |
|                                       | MMP9_574     | I = in situ        | 28 (90%)             | 3 (10%)     |         |            |  | 1 (3%)             | 30 (97%)      |         |            |
|                                       | MMP9_574     | II                 | 62 (93%)             | 5 (8%)      |         |            |  | 0 (0%)             | 67 (100%)     |         |            |
|                                       | MMP9_574     | III                | 79 (93%)             | 6 (7%)      |         |            |  | 0 (0%)             | 85 (100%)     |         |            |
|                                       | MMP9_574     | IV                 | 217 (90%)            | 24 (10%)    |         |            |  | 0 (0%)             | 241 (100%)    |         |            |
| <b>Tumor Infiltrating Lymphocytes</b> | MMP9_574     | V                  | 34 (87%)             | 5 (13%)     | 0.4     | Trend      |  | 0 (0%)             | 39 (100%)     | 0.04    | Trend      |
|                                       | MMP9_574     | absent             | 106 (89%)            | 13 (11%)    |         |            |  | 0 (0%)             | 119 (100%)    |         |            |
|                                       | MMP9_574     | non-brisk          | 162 (90%)            | 18 (10%)    |         |            |  | 0 (0%)             | 180 (100%)    |         |            |
| <b>Number of Moles</b>                | MMP9_574     | brisk              | 15 (94%)             | 1 (6%)      | 0.6     | Trend      |  | 0 (0%)             | 16 (100%)     | 0.6     | Trend      |
|                                       | MMP9_574     | none               | 153 (92%)            | 14 (8%)     |         |            |  | 1 (1%)             | 166 (99%)     |         |            |
|                                       | MMP9_574     | few                | 211 (91%)            | 22 (9%)     |         |            |  | 0 (0%)             | 233 (100%)    |         |            |

|                                | Polymorphism | variable           | Homozygote Reference | Any Variant | p-value | Test       |  | Homozygote Variant | Any Reference | p-value | Test       |
|--------------------------------|--------------|--------------------|----------------------|-------------|---------|------------|--|--------------------|---------------|---------|------------|
|                                | MMP9_574     | moderate           | 72 (95%)             | 4 (5%)      |         |            |  | 0 (0%)             | 76 (100%)     |         |            |
| <b>Number of Freckles</b>      | MMP9_574     | many               | 24 (86%)             | 4 (14%)     | 0.84    | Trend      |  | 0 (0%)             | 28 (100%)     | 0.28    | Trend      |
|                                | MMP9_574     | 1 = none           | 227 (90%)            | 25 (10%)    |         |            |  | 1 (0%)             | 251 (100%)    |         |            |
|                                | MMP9_574     | 2                  | 124 (89%)            | 15 (11%)    |         |            |  | 0 (0%)             | 139 (100%)    |         |            |
|                                | MMP9_574     | 3                  | 81 (93%)             | 6 (7%)      |         |            |  | 0 (0%)             | 87 (100%)     |         |            |
|                                | MMP9_574     | 4                  | 32 (100%)            | 0 (0%)      |         |            |  | 0 (0%)             | 32 (100%)     |         |            |
|                                | MMP9_574     | 5                  | 6 (100%)             | 0 (0%)      |         |            |  | 0 (0%)             | 6 (100%)      |         |            |
| <b>Phenotypic Index</b>        | MMP9_574     | 6 = many           | 1 (50%)              | 1 (50%)     | 0.24    | Trend      |  | 0 (0%)             | 2 (100%)      | 0.4     | Trend      |
|                                | MMP9_574     | 1 = low risk       | 15 (75%)             | 5 (25%)     |         |            |  | 1 (5%)             | 19 (95%)      |         |            |
|                                | MMP9_574     | 2                  | 87 (88%)             | 12 (12%)    |         |            |  | 0 (0%)             | 99 (100%)     |         |            |
|                                | MMP9_574     | 3                  | 165 (95%)            | 8 (5%)      |         |            |  | 0 (0%)             | 173 (100%)    |         |            |
|                                | MMP9_574     | 4                  | 161 (90%)            | 17 (10%)    |         |            |  | 0 (0%)             | 178 (100%)    |         |            |
|                                | MMP9_574     | 5 = high risk      | 56 (90%)             | 6 (10%)     | 0.24    | Trend      |  | 0 (0%)             | 62 (100%)     | 0.04    | Trend      |
| <b>Sex</b>                     | MMP9_574     | F                  | 220 (91%)            | 22 (9%)     |         |            |  | 1 (0%)             | 241 (100%)    |         |            |
|                                | MMP9_574     | M                  | 265 (91%)            | 26 (9%)     | 1       | Fisher     |  | 0 (0%)             | 291 (100%)    | 0.44    | Fisher     |
| <b>Family History</b>          | MMP9_574     | N                  | 395 (90%)            | 45 (10%)    |         |            |  | 0 (0%)             | 440 (100%)    |         |            |
|                                | MMP9_574     | Y                  | 88 (97%)             | 3 (3%)      | 0.04    | Fisher     |  | 1 (1%)             | 90 (99%)      | 0.16    | Fisher     |
| <b>Multiple Primary</b>        | MMP9_574     | N                  | 410 (90%)            | 45 (10%)    |         |            |  | 1 (0%)             | 454 (100%)    |         |            |
|                                | MMP9_574     | Y                  | 75 (96%)             | 3 (4%)      | 0.08    | Fisher     |  | 0 (0%)             | 78 (100%)     | 1       | Fisher     |
| <b>Dysplastic Nevus</b>        | MMP9_574     | N                  | 307 (90%)            | 33 (10%)    |         |            |  | 1 (0%)             | 339 (100%)    |         |            |
|                                | MMP9_574     | Y                  | 117 (93%)            | 9 (7%)      | 0.48    | Fisher     |  | 0 (0%)             | 126 (100%)    | 1       | Fisher     |
| <b>Ulceration</b>              | MMP9_574     | absent             | 254 (91%)            | 25 (9%)     |         |            |  | 0 (0%)             | 279 (100%)    |         |            |
|                                | MMP9_574     | present            | 85 (89%)             | 11 (12%)    | 0.56    | Fisher     |  | 0 (0%)             | 96 (100%)     | 0.56    | Fisher     |
| <b>Regression</b>              | MMP9_574     | absent             | 181 (90%)            | 20 (10%)    |         |            |  | 0 (0%)             | 201 (100%)    |         |            |
|                                | MMP9_574     | present            | 104 (90%)            | 12 (10%)    | 1       | Fisher     |  | 0 (0%)             | 116 (100%)    | 1       | Fisher     |
| <b>Lymphovascular Invasion</b> | MMP9_574     | absent             | 267 (90%)            | 30 (10%)    |         |            |  | 0 (0%)             | 297 (100%)    |         |            |
|                                | MMP9_574     | present            | 26 (93%)             | 2 (7%)      | 1       | Fisher     |  | 0 (0%)             | 28 (100%)     | 1       | Fisher     |
| <b>Perineural Invasion</b>     | MMP9_574     | absent             | 176 (90%)            | 20 (10%)    |         |            |  | 0 (0%)             | 196 (100%)    |         |            |
|                                | MMP9_574     | present            | 26 (90%)             | 3 (10%)     | 1       | Fisher     |  | 0 (0%)             | 29 (100%)     | 1       | Fisher     |
| <b>Mitotic Index</b>           | MMP9_574     | absent             | 58 (92%)             | 5 (8%)      |         |            |  | 0 (0%)             | 63 (100%)     |         |            |
|                                | MMP9_574     | present            | 184 (89%)            | 23 (11%)    | 0.64    | Fisher     |  | 0 (0%)             | 207 (100%)    | 0.64    | Fisher     |
| <b>Satellites</b>              | MMP9_574     | absent             | 116 (89%)            | 14 (11%)    |         |            |  | 0 (0%)             | 130 (100%)    |         |            |
|                                | MMP9_574     | present            | 14 (93%)             | 1 (7%)      | 1       | Fisher     |  | 0 (0%)             | 15 (100%)     | 1       | Fisher     |
| <b>Solar Elastosis</b>         | MMP9_574     | absent             | 11 (92%)             | 1 (8%)      |         |            |  | 0 (0%)             | 12 (100%)     |         |            |
|                                | MMP9_574     | present            | 22 (85%)             | 4 (15%)     | 1       | Fisher     |  | 0 (0%)             | 26 (100%)     | 1       | Fisher     |
| <b>Distant Metastasis</b>      | MMP9_574     | N                  | 405 (91%)            | 41 (9%)     |         |            |  | 1 (0%)             | 445 (100%)    |         |            |
|                                | MMP9_574     | Y                  | 79 (92%)             | 7 (8%)      | 1       | Fisher     |  | 0 (0%)             | 86 (100%)     | 1       | Fisher     |
| <b>Intransit Metastasis</b>    | MMP9_574     | N                  | 449 (92%)            | 40 (8%)     |         |            |  | 1 (0%)             | 488 (100%)    |         |            |
|                                | MMP9_574     | Y                  | 19 (91%)             | 2 (10%)     | 0.68    | Fisher     |  | 0 (0%)             | 21 (100%)     | 1       | Fisher     |
| <b>Tan/Burn Index</b>          | MMP9_574     | tend to tan        | 45 (90%)             | 5 (10%)     |         |            |  | 1 (2%)             | 49 (98%)      |         |            |
|                                | MMP9_574     | tend to sunburn    | 440 (91%)            | 43 (9%)     | 0.8     | Fisher     |  | 0 (0%)             | 483 (100%)    | 0.08    | Fisher     |
| <b>Race</b>                    | MMP9_574     | White non-Hispanic | 465 (92%)            | 43 (9%)     |         |            |  | 1 (0%)             | 507 (100%)    |         |            |
|                                | MMP9_574     | Hispanic           | 5 (63%)              | 3 (38%)     |         |            |  | 0 (0%)             | 8 (100%)      |         |            |
|                                | MMP9_574     | Black non-Hispanic | 4 (67%)              | 2 (33%)     |         |            |  | 0 (0%)             | 6 (100%)      |         |            |
|                                | MMP9_574     | Asian/Indian       | 2 (100%)             | 0 (0%)      | <0.01   | Chi-Square |  | 0 (0%)             | 2 (100%)      | 1       | Chi-Square |
| <b>Site</b>                    | MMP9_574     | extremities        | 263 (88%)            | 36 (12%)    |         |            |  | 0 (0%)             | 299 (100%)    |         |            |



|                                       | Polymorphism | variable      | Homozygote Reference | Any Variant | p-value | Test       |  | Homozygote Variant | Any Reference | p-value | Test       |
|---------------------------------------|--------------|---------------|----------------------|-------------|---------|------------|--|--------------------|---------------|---------|------------|
|                                       | MMP9_574     | head & neck   | 36 (97%)             | 1 (3%)      |         |            |  | 0 (0%)             | 37 (100%)     |         |            |
|                                       | MMP9_574     | non-cutaneous | 6 (100%)             | 0 (0%)      |         |            |  | 0 (0%)             | 6 (100%)      |         |            |
| <b>Histology</b>                      | MMP9_574     | trunk         | 164 (96%)            | 7 (4%)      | <0.01   | Chi-Square |  | 1 (1%)             | 170 (99%)     | 0.56    | Chi-Square |
|                                       | MMP9_574     | desmoplastic  | 7 (88%)              | 1 (13%)     |         |            |  | 0 (0%)             | 8 (100%)      |         |            |
|                                       | MMP9_574     | other         | 117 (91%)            | 12 (9%)     |         |            |  | 0 (0%)             | 129 (100%)    |         |            |
|                                       | MMP9_574     | spitzoid      | 2 (50%)              | 2 (50%)     |         |            |  | 0 (0%)             | 4 (100%)      |         |            |
|                                       | MMP9_574     | unknown       | 359 (92%)            | 33 (8%)     | 0.04    | Chi-Square |  | 1 (0%)             | 391 (100%)    | 0.96    | Chi-Square |
| <b>Stage at Diagnosis</b>             | MMP9_668     | 0             | 38 (66%)             | 20 (35%)    |         |            |  | 2 (3%)             | 56 (97%)      |         |            |
|                                       | MMP9_668     | I             | 355 (71%)            | 147 (29%)   |         |            |  | 12 (2%)            | 490 (98%)     |         |            |
|                                       | MMP9_668     | II            | 164 (70%)            | 69 (30%)    |         |            |  | 1 (0%)             | 232 (100%)    |         |            |
|                                       | MMP9_668     | III           | 130 (77%)            | 38 (23%)    |         |            |  | 3 (2%)             | 165 (98%)     |         |            |
|                                       | MMP9_668     | IV            | 8 (89%)              | 1 (11%)     | 0.04    | Trend      |  | 0 (0%)             | 9 (100%)      | 0.16    | Trend      |
| <b>Current Stage</b>                  | MMP9_668     | 0             | 36 (64%)             | 20 (36%)    |         |            |  | 2 (4%)             | 54 (96%)      |         |            |
|                                       | MMP9_668     | I             | 302 (70%)            | 131 (30%)   |         |            |  | 11 (3%)            | 422 (98%)     |         |            |
|                                       | MMP9_668     | II            | 114 (72%)            | 44 (28%)    |         |            |  | 0 (0%)             | 158 (100%)    |         |            |
|                                       | MMP9_668     | III           | 163 (76%)            | 53 (25%)    |         |            |  | 4 (2%)             | 212 (98%)     |         |            |
|                                       | MMP9_668     | IV            | 98 (77%)             | 30 (23%)    | 0.04    | Trend      |  | 2 (2%)             | 126 (98%)     | 0.28    | Trend      |
| <b>Thickness</b>                      | MMP9_668     | in situ       | 38 (66%)             | 20 (35%)    |         |            |  | 2 (3%)             | 56 (97%)      |         |            |
|                                       | MMP9_668     | <1.01         | 219 (69%)            | 100 (31%)   |         |            |  | 9 (3%)             | 310 (97%)     |         |            |
|                                       | MMP9_668     | 1.01 - 2.00   | 205 (75%)            | 67 (25%)    |         |            |  | 3 (1%)             | 269 (99%)     |         |            |
|                                       | MMP9_668     | 2.01 - 4.00   | 115 (72%)            | 44 (28%)    |         |            |  | 3 (2%)             | 156 (98%)     |         |            |
|                                       | MMP9_668     | >4.00         | 84 (70%)             | 36 (30%)    | 0.4     | Trend      |  | 1 (1%)             | 119 (99%)     | 0.12    | Trend      |
| <b>Clark Level</b>                    | MMP9_668     | I = in situ   | 38 (66%)             | 20 (35%)    |         |            |  | 2 (3%)             | 56 (97%)      |         |            |
|                                       | MMP9_668     | II            | 73 (68%)             | 34 (32%)    |         |            |  | 2 (2%)             | 105 (98%)     |         |            |
|                                       | MMP9_668     | III           | 101 (67%)            | 49 (33%)    |         |            |  | 7 (5%)             | 143 (95%)     |         |            |
|                                       | MMP9_668     | IV            | 355 (73%)            | 130 (27%)   |         |            |  | 5 (1%)             | 480 (99%)     |         |            |
|                                       | MMP9_668     | V             | 45 (65%)             | 24 (35%)    | 0.32    | Trend      |  | 1 (1%)             | 68 (99%)      | 0.12    | Trend      |
| <b>Tumor Infiltrating Lymphocytes</b> | MMP9_668     | absent        | 146 (71%)            | 59 (29%)    |         |            |  | 4 (2%)             | 201 (98%)     |         |            |
|                                       | MMP9_668     | non-brisk     | 279 (71%)            | 114 (29%)   |         |            |  | 5 (1%)             | 388 (99%)     |         |            |
|                                       | MMP9_668     | brisk         | 24 (77%)             | 7 (23%)     | 0.72    | Trend      |  | 0 (0%)             | 31 (100%)     | 0.36    | Trend      |
| <b>Number of Moles</b>                | MMP9_668     | none          | 183 (71%)            | 76 (29%)    |         |            |  | 8 (3%)             | 251 (97%)     |         |            |
|                                       | MMP9_668     | few           | 359 (72%)            | 137 (28%)   |         |            |  | 9 (2%)             | 487 (98%)     |         |            |
|                                       | MMP9_668     | moderate      | 119 (71%)            | 48 (29%)    |         |            |  | 1 (1%)             | 166 (99%)     |         |            |
|                                       | MMP9_668     | many          | 30 (75%)             | 10 (25%)    | 0.68    | Trend      |  | 1 (3%)             | 39 (98%)      | 0.16    | Trend      |
| <b>Number of Freckles</b>             | MMP9_668     | 1 = none      | 338 (71%)            | 140 (29%)   |         |            |  | 6 (1%)             | 472 (99%)     |         |            |
|                                       | MMP9_668     | 2             | 183 (76%)            | 57 (24%)    |         |            |  | 3 (1%)             | 237 (99%)     |         |            |
|                                       | MMP9_668     | 3             | 122 (71%)            | 49 (29%)    |         |            |  | 5 (3%)             | 166 (97%)     |         |            |
|                                       | MMP9_668     | 4             | 44 (68%)             | 21 (32%)    |         |            |  | 4 (6%)             | 61 (94%)      |         |            |
|                                       | MMP9_668     | 5             | 12 (71%)             | 5 (29%)     |         |            |  | 0 (0%)             | 17 (100%)     |         |            |
|                                       | MMP9_668     | 6 = many      | 4 (67%)              | 2 (33%)     | 0.88    | Trend      |  | 0 (0%)             | 6 (100%)      | 0.04    | Trend      |
| <b>Phenotypic Index</b>               | MMP9_668     | 1 = low risk  | 20 (53%)             | 18 (47%)    |         |            |  | 0 (0%)             | 38 (100%)     |         |            |
|                                       | MMP9_668     | 2             | 160 (77%)            | 48 (23%)    |         |            |  | 2 (1%)             | 206 (99%)     |         |            |
|                                       | MMP9_668     | 3             | 222 (71%)            | 93 (30%)    |         |            |  | 10 (3%)            | 305 (97%)     |         |            |
|                                       | MMP9_668     | 4             | 240 (73%)            | 87 (27%)    |         |            |  | 5 (2%)             | 322 (99%)     |         |            |
|                                       | MMP9_668     | 5 = high risk | 73 (70%)             | 32 (31%)    | 0.8     | Trend      |  | 2 (2%)             | 103 (98%)     | 0.64    | Trend      |
| <b>Sex</b>                            | MMP9_668     | F             | 311 (73%)            | 116 (27%)   |         |            |  | 7 (2%)             | 420 (98%)     |         |            |

|                                | Polymorphism | variable           | Homozygote Reference | Any Variant | p-value | Test       |  | Homozygote Variant | Any Reference | p-value | Test       |
|--------------------------------|--------------|--------------------|----------------------|-------------|---------|------------|--|--------------------|---------------|---------|------------|
| <b>Family History</b>          | MMP9_668     | M                  | 405 (71%)            | 165 (29%)   | 0.56    | Fisher     |  | 12 (2%)            | 558 (98%)     | 0.64    | Fisher     |
|                                | MMP9_668     | N                  | 598 (73%)            | 225 (27%)   |         |            |  | 14 (2%)            | 809 (98%)     |         |            |
| <b>Multiple Primary</b>        | MMP9_668     | Y                  | 113 (69%)            | 52 (32%)    | 0.28    | Fisher     |  | 5 (3%)             | 160 (97%)     | 0.36    | Fisher     |
|                                | MMP9_668     | N                  | 612 (72%)            | 235 (28%)   |         |            |  | 17 (2%)            | 830 (98%)     |         |            |
| <b>Dysplastic Nevus</b>        | MMP9_668     | Y                  | 104 (70%)            | 45 (30%)    | 0.56    | Fisher     |  | 2 (1%)             | 147 (99%)     | 0.76    | Fisher     |
|                                | MMP9_668     | N                  | 395 (73%)            | 148 (27%)   |         |            |  | 11 (2%)            | 532 (98%)     |         |            |
| <b>Ulceration</b>              | MMP9_668     | Y                  | 145 (67%)            | 72 (33%)    | 0.12    | Fisher     |  | 4 (2%)             | 213 (98%)     | 1       | Fisher     |
|                                | MMP9_668     | absent             | 379 (71%)            | 156 (29%)   |         |            |  | 12 (2%)            | 523 (98%)     |         |            |
| <b>Regression</b>              | MMP9_668     | present            | 135 (72%)            | 53 (28%)    | 0.84    | Fisher     |  | 2 (1%)             | 186 (99%)     | 0.52    | Fisher     |
|                                | MMP9_668     | absent             | 271 (72%)            | 105 (28%)   |         |            |  | 4 (1%)             | 372 (99%)     |         |            |
| <b>Lymphovascular Invasion</b> | MMP9_668     | present            | 180 (70%)            | 79 (31%)    | 0.52    | Fisher     |  | 5 (2%)             | 254 (98%)     | 0.48    | Fisher     |
|                                | MMP9_668     | absent             | 400 (71%)            | 165 (29%)   |         |            |  | 9 (2%)             | 556 (98%)     |         |            |
| <b>Perineural Invasion</b>     | MMP9_668     | present            | 50 (74%)             | 18 (27%)    | 0.68    | Fisher     |  | 2 (3%)             | 66 (97%)      | 0.32    | Fisher     |
|                                | MMP9_668     | absent             | 303 (72%)            | 121 (29%)   |         |            |  | 7 (2%)             | 417 (98%)     |         |            |
| <b>Mitotic Index</b>           | MMP9_668     | present            | 42 (68%)             | 20 (32%)    | 0.56    | Fisher     |  | 0 (0%)             | 62 (100%)     | 0.6     | Fisher     |
|                                | MMP9_668     | absent             | 73 (72%)             | 29 (28%)    |         |            |  | 2 (2%)             | 100 (98%)     |         |            |
| <b>Satellites</b>              | MMP9_668     | present            | 324 (71%)            | 134 (29%)   | 0.92    | Fisher     |  | 6 (1%)             | 452 (99%)     | 0.64    | Fisher     |
|                                | MMP9_668     | absent             | 189 (75%)            | 63 (25%)    |         |            |  | 1 (0%)             | 251 (100%)    |         |            |
| <b>Solar Elastosis</b>         | MMP9_668     | present            | 25 (83%)             | 5 (17%)     | 0.36    | Fisher     |  | 0 (0%)             | 30 (100%)     | 1       | Fisher     |
|                                | MMP9_668     | absent             | 18 (82%)             | 4 (18%)     |         |            |  | 0 (0%)             | 22 (100%)     |         |            |
| <b>Distant Metastasis</b>      | MMP9_668     | present            | 30 (75%)             | 10 (25%)    | 0.76    | Fisher     |  | 0 (0%)             | 40 (100%)     | 0.76    | Fisher     |
|                                | MMP9_668     | N                  | 617 (71%)            | 249 (29%)   |         |            |  | 17 (2%)            | 849 (98%)     |         |            |
| <b>Intransit Metastasis</b>    | MMP9_668     | Y                  | 99 (77%)             | 30 (23%)    | 0.2     | Fisher     |  | 2 (2%)             | 127 (98%)     | 1       | Fisher     |
|                                | MMP9_668     | N                  | 667 (71%)            | 270 (29%)   |         |            |  | 18 (2%)            | 919 (98%)     |         |            |
| <b>Tan/Burn Index</b>          | MMP9_668     | Y                  | 22 (82%)             | 5 (19%)     | 0.28    | Fisher     |  | 1 (4%)             | 26 (96%)      | 0.44    | Fisher     |
|                                | MMP9_668     | tend to tan        | 55 (60%)             | 36 (40%)    |         |            |  | 2 (2%)             | 89 (98%)      |         |            |
| <b>Race</b>                    | MMP9_668     | tend to sunburn    | 661 (73%)            | 245 (27%)   | <0.01   | Fisher     |  | 17 (2%)            | 889 (98%)     | 0.68    | Fisher     |
|                                | MMP9_668     | White non-Hispanic | 687 (72%)            | 269 (28%)   |         |            |  | 18 (2%)            | 938 (98%)     |         |            |
|                                | MMP9_668     | Hispanic           | 7 (64%)              | 4 (36%)     |         |            |  | 0 (0%)             | 11 (100%)     |         |            |
|                                | MMP9_668     | Black non-Hispanic | 7 (64%)              | 4 (36%)     |         |            |  | 1 (9%)             | 10 (91%)      |         |            |
| <b>Site</b>                    | MMP9_668     | Asian/Indian       | 2 (67%)              | 1 (33%)     | 0.88    | Chi-Square |  | 0 (0%)             | 3 (100%)      | 0.36    | Chi-Square |
|                                | MMP9_668     | extremities        | 375 (70%)            | 158 (30%)   |         |            |  | 12 (2%)            | 521 (98%)     |         |            |
|                                | MMP9_668     | head & neck        | 49 (69%)             | 22 (31%)    |         |            |  | 1 (1%)             | 70 (99%)      |         |            |
|                                | MMP9_668     | non-cutaneous      | 6 (55%)              | 5 (46%)     |         |            |  | 2 (18%)            | 9 (82%)       |         |            |
| <b>Histology</b>               | MMP9_668     | trunk              | 252 (74%)            | 88 (26%)    | 0.36    | Chi-Square |  | 4 (1%)             | 336 (99%)     | <0.01   | Chi-Square |
|                                | MMP9_668     | desmoplastic       | 16 (70%)             | 7 (30%)     |         |            |  | 0 (0%)             | 23 (100%)     |         |            |
|                                | MMP9_668     | other              | 170 (70%)            | 72 (30%)    |         |            |  | 4 (2%)             | 238 (98%)     |         |            |
|                                | MMP9_668     | spitzoid           | 8 (80%)              | 2 (20%)     |         |            |  | 0 (0%)             | 10 (100%)     |         |            |
|                                | MMP9_668     | unknown            | 522 (72%)            | 200 (28%)   | 0.84    | Chi-Square |  | 15 (2%)            | 707 (98%)     | 0.84    | Chi-Square |
